# Supplementary material for: A machine learning model to estimate myocardial stiffness from EDPVR
Source: PubMed Central journal article supplement (PMC8971532; doi:10.1038/s41598-022-09128-6), 2022-03-31
Supplement: 41598_2022_9128_MOESM1_ESM.pdf [file 41598_2022_9128_MOESM1_ESM.pdf]

## Supplementary Information

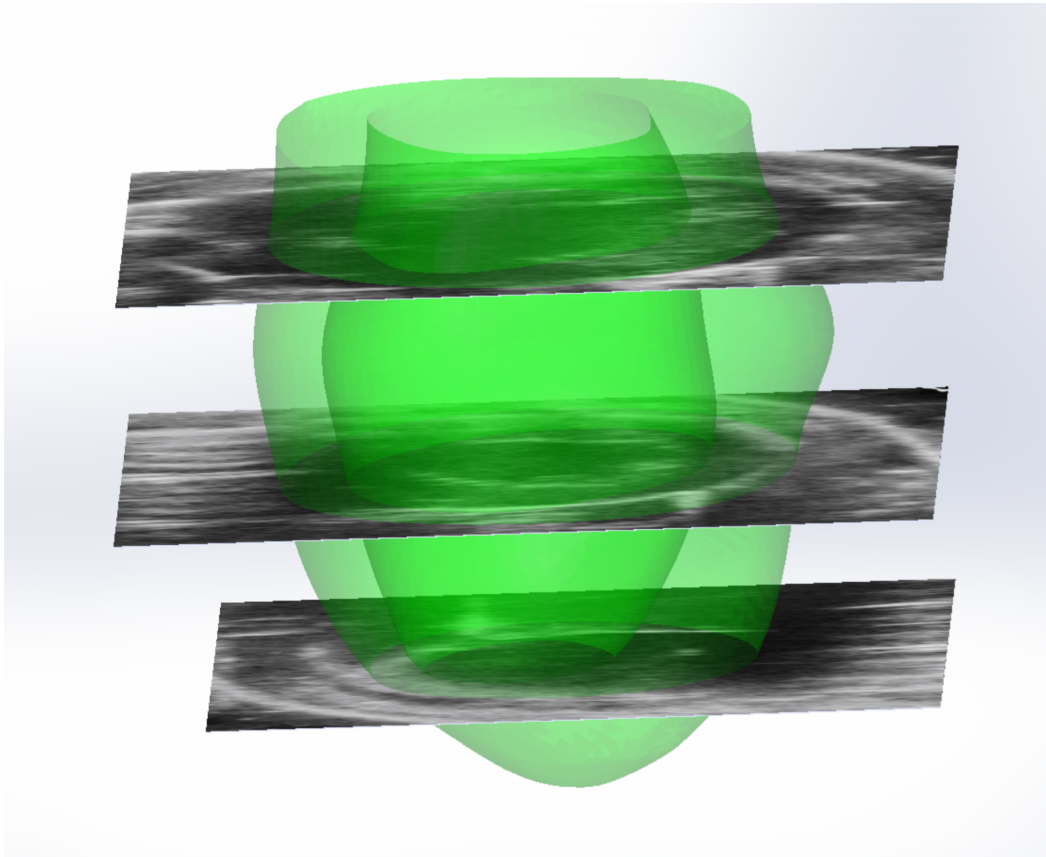

**Supplementary Figure 1.** Reconstructed LV geometry from short-axis echocardiography slices to estimate geometric features.

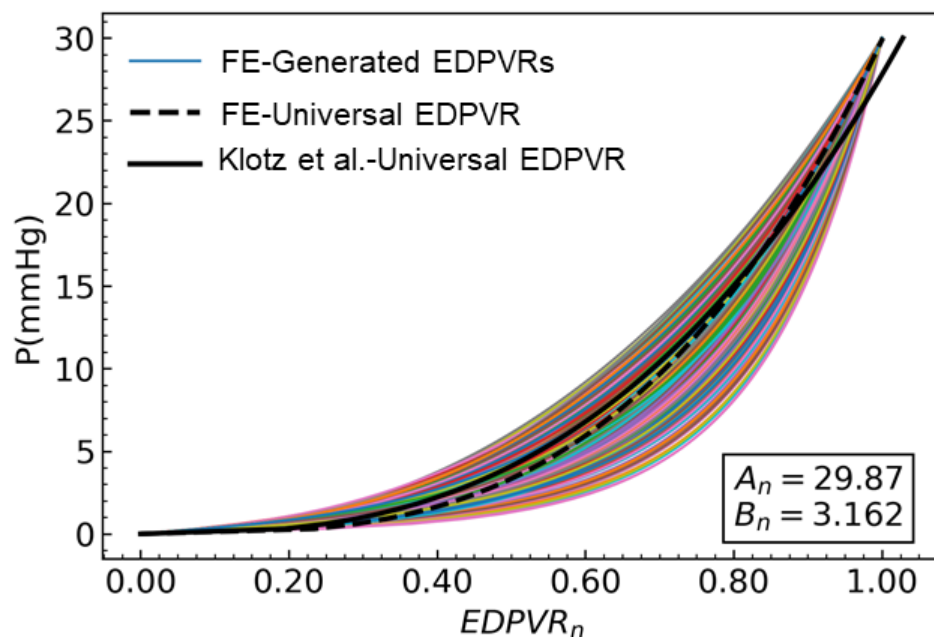

**Supplementary Figure 2.** Universal EDPVR calculated by normalizing 2,500 individual EDPVRs (Fig. 7) following the method described in Klotz et al.<sup>1</sup>.

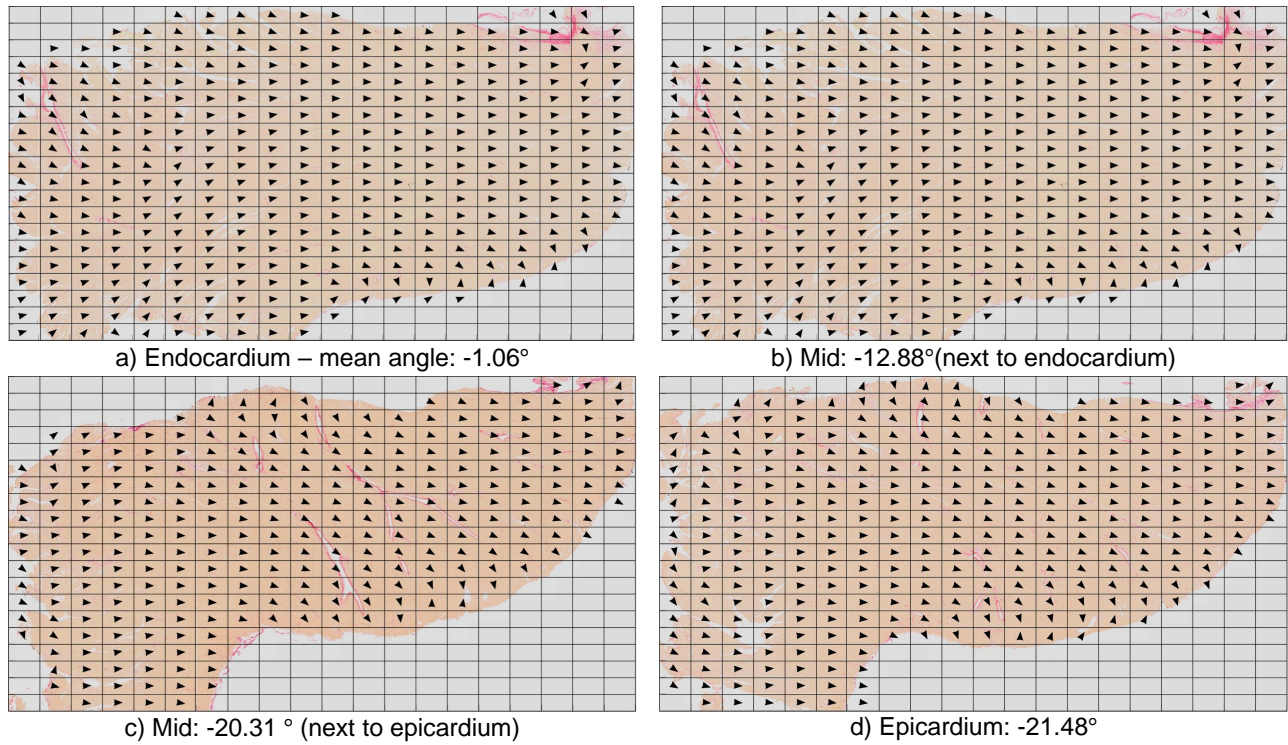

**Supplementary Figure 3.** Estimation of mean myofiber orientation across the LVFW at four select sections stained by picrosirius red. Black arrows indicate local fiber orientation.

## References

1. Klotz, S. *et al.* Single-beat estimation of end-diastolic pressure-volume relationship: a novel method with potential for noninvasive application. *Am. J. Physiol. Circ. Physiol.* **291**, H403–H412 (2006).
